# Supplementary material for: Seasonal benthic species composition linked to coastal defense structures (CDS) in Kuala Nerus, Terengganu, Malaysia
Source: PeerJ. 2023 Nov 14;11:e16203. doi: 10.7717/peerj.16203 (PMC10655723; doi:10.7717/peerj.16203)
Supplement: Supplemental Information 1 [file peerj-11-16203-s001.xlsx]

## Sheet: BrayC,nmds, anosim SWM
	Species	Acteocina sp.	Acteocina exilis	Acteon sp.	Aliculastrum sp.	Alvania sp.	Anachis sp.	Anticlimax	Antisolarium sp.	Apaturris sp.	Atlanta sp.	Barleeia sp.	Bittium sp.	Brachycythara sp.	Buccinoidea	Calyptrea	Ceacum sp.	Cerithiopsis sp. 1	Cerithiopsis sp. 2	Cerithium sp.	Chrysallida sp. 1	Chrysallida sp. 2	Chrysallida sp. 3	Circulus sp.	Colpospira sp.	Creseis sp.	Eatonina sp.	Emarginula	Epitonium sp.	Eulima sp. 1	Eulima sp. 2	Eulimella sp.	Eulithidium sp.	Finella sp.	Gastropod 2	Gastropod 5	Haminoea sp.	Lironoba sp.	Mangelia sp. 1	Mathilda retusa	Mendax barbarae	Moerchia sp.	Monophorus sp. 1	Monophorus sp. 2	Nassarius sp.	Naticidae	Oscilla sp.	Oliva sp.	Patelloida sp.1
	G-L1	28.9855	623.188	14.4928	217.391	2188.41	86.9565	0	0	0	0	57.971	1130.43	0	28.9855	72.4638	14.4928	101.449	0	14.4928	72.4638	0	0	57.971	0	304.348	971.014	0	0	43.4783	72.4638	14.4928	115.942	2463.77	550.725	14.4928	101.449	0	0	72.4638	101.449	14.4928	28.9855	14.4928	0	43.4783	43.4783	0	0
	G-W	28.9855	304.348	0	144.928	2086.96	28.9855	0	0	0	0	28.9855	536.232	0	14.4928	0	0	14.4928	14.4928	0	0	0	0	14.4928	14.4928	43.4783	536.232	0	0	0	0	0	0	420.29	275.362	0	0	0	14.4928	43.4783	28.9855	0	14.4928	0	0	28.9855	0	0	0
	G-L2	173.913	782.609	0	304.348	579.71	14.4928	0	0	14.4928	0	28.9855	130.435	0	0	14.4928	0	0	0	0	0	0	0	0	0	28.9855	1188.41	0	14.4928	14.4928	0	0	0	521.739	43.4783	0	101.449	0	14.4928	14.4928	0	0	0	14.4928	0	0	0	0	0
	S-L	115.942	43.4783	0	115.942	217.391	14.4928	14.4928	0	0	14.4928	14.4928	478.261	0	14.4928	14.4928	0	0	0	565.217	0	0	0	14.4928	0	28.9855	681.159	14.4928	14.4928	28.9855	0	0	14.4928	1579.71	43.4783	14.4928	0	0	57.971	0	57.971	0	0	0	173.913	14.4928	0	0	0
	S-W	159.42	362.319	0	188.406	449.275	0	0	0	0	0	0	202.899	0	0	0	14.4928	14.4928	14.4928	0	0	0	0	43.4783	0	0	1072.46	14.4928	0	86.9565	0	0	28.9855	376.812	173.913	0	57.971	0	14.4928	57.971	28.9855	0	0	28.9855	0	0	0	0	0
	B-L1	43.4783	43.4783	14.4928	28.9855	217.391	14.4928	0	0	0	0	0	57.971	0	0	28.9855	14.4928	0	0	0	0	0	0	0	0	14.4928	202.899	0	14.4928	43.4783	0	0	0	57.971	0	0	28.9855	0	0	0	0	0	0	0	14.4928	0	0	14.4928	0
	B-W	57.971	260.87	28.9855	144.928	144.928	14.4928	0	0	0	0	14.4928	57.971	0	28.9855	0	14.4928	28.9855	14.4928	0	14.4928	0	0	0	0	0	333.333	0	0	43.4783	0	0	14.4928	101.449	14.4928	0	0	0	0	0	57.971	0	0	0	0	0	0	0	0
	B-L2	14.4928	28.9855	0	14.4928	217.391	0	0	0	0	0	0	43.4783	0	0	14.4928	0	0	0	0	0	0	0	0	0	14.4928	14.4928	14.4928	0	72.4638	0	0	0	478.261	57.971	0	28.9855	0	0	0	0	0	0	0	14.4928	0	0	0	0
	T-L1	14.4928	0	0	28.9855	159.42	0	0	0	0	0	0	72.4638	0	0	14.4928	14.4928	14.4928	0	0	0	0	0	0	0	14.4928	14.4928	14.4928	0	0	0	0	0	217.391	0	0	0	0	0	0	14.4928	0	0	0	115.942	0	0	0	0
	T-W	159.42	318.841	0	115.942	666.667	0	0	0	0	0	0	173.913	0	0	28.9855	0	0	0	0	0	0	0	0	0	0	478.261	0	0	14.4928	0	0	14.4928	420.29	43.4783	0	188.406	0	0	0	0	0	0	0	0	0	0	0	0
	T-L2	0	43.4783	0	86.9565	1217.39	28.9855	57.971	14.4928	0	115.942	14.4928	1304.35	0	0	202.899	0	0	0	4405.8	43.4783	0	0	14.4928	0	478.261	217.391	14.4928	0	43.4783	0	0	0	4000	0	0	57.971	0	0	0	0	0	0	0	43.4783	14.4928	0	0	0
	C	28.9855	188.406	14.4928	115.942	1507.25	28.9855	0	0	0	14.4928	0	434.783	14.4928	0	72.4638	14.4928	28.9855	0	0	28.9855	43.4783	43.4783	28.9855	0	14.4928	260.87	0	0	28.9855	14.4928	0	28.9855	1913.04	14.4928	43.4783	0	14.4928	0	72.4638	28.9855	0	28.9855	14.4928	0	28.9855	28.9855	0	43.4783
[truncated: 96 more columns]

## Sheet: BrayC,nmds, anosim NEM
	Northeast monsoon
	Species	Acteocina sp.	Acteocina exilis	Acteon sp.	Aliculastrum sp.	Alvania sp.	Anachis sp.	Anticlimax	Antisolarium	Atlanta sp.	Assiminea	Barleeia sp.	Bittium sp.	Buccinoidea	Brachycythara	Calyptrea	Cavolinia	Ceacum sp.	Cerithiopsis sp. 1	Cerithiopsis sp. 2	Chrysallida sp. 1	Chrysallida sp. 2	Circulus sp.	Cingulina sp.	Clanculus	Colpospira sp.	Creseis sp.	Diacavolinia	Diacria	Eatonina sp.	Emarginula	Epitonium sp.	Eulima sp. 1	Eulima sp. 2	Eulimella sp.	Eulithidium sp.	Finella sp.	Fossarius	Gastropod 2	Gastropod 5	Haminoea sp.	Lironoba	Longchaeus sp.	Mangelia sp. 1	Mangelia sp. 2	Mendax barbarae	Moerchia sp. 1	Moerchia sp. 2	Monophorus sp. 1
	G-L1	0	14.4928	0	43.4783	28.9855	0	14.4928	159.42	0	0	0	28.9855	0	0	0	43.4783	43.4783	0	0	0	0	0	0	0	0	86.9565	57.971	57.971	28.9855	14.4928	0	14.4928	0	0	0	43.4783	0	14.4928	0	0	0	0	43.4783	0	14.4928	0	0	0
	G-W	43.4783	260.87	57.971	28.9855	144.928	14.4928	14.4928	0	0	0	43.4783	1043.48	14.4928	57.971	28.9855	0	101.449	0	14.4928	43.4783	14.4928	14.4928	0	0	14.4928	86.9565	0	0	811.594	0	43.4783	72.4638	0	0	130.435	231.884	14.4928	507.246	0	28.9855	0	0	0	0	144.928	28.9855	28.9855	0
	G-L2	0	0	0	14.4928	0	0	0	0	0	0	0	43.4783	0	0	0	0	0	0	0	0	0	0	0	0	0	159.42	0	0	0	0	0	0	0	0	0	0	0	43.4783	0	0	0	0	0	0	0	0	0	0
	S-L	0	72.4638	28.9855	159.42	144.928	28.9855	0	28.9855	0	0	0	115.942	14.4928	0	14.4928	0	0	0	0	0	0	14.4928	0	0	0	144.928	0	0	115.942	0	0	0	0	28.9855	0	14.4928	0	0	14.4928	0	0	14.4928	0	0	43.4783	0	0	0
	S-W	101.449	695.652	0	86.9565	884.058	43.4783	0	0	0	28.9855	57.971	855.072	0	72.4638	0	0	202.899	130.435	28.9855	14.4928	0	28.9855	14.4928	0	14.4928	28.9855	0	0	1608.7	0	14.4928	101.449	0	28.9855	86.9565	492.754	14.4928	797.101	28.9855	0	14.4928	0	0	0	173.913	101.449	57.971	0
	B-L1	28.9855	101.449	43.4783	347.826	144.928	72.4638	14.4928	0	0	0	0	57.971	0	0	14.4928	0	0	43.4783	0	14.4928	0	0	14.4928	14.4928	0	0	0	0	72.4638	0	0	28.9855	0	0	130.435	231.884	14.4928	57.971	0	0	0	0	43.4783	0	57.971	14.4928	0	0
	B-W	14.4928	101.449	0	14.4928	115.942	14.4928	57.971	14.4928	0	0	0	101.449	0	0	0	0	28.9855	0	0	0	0	0	0	0	0	0	0	0	159.42	0	0	14.4928	0	0	28.9855	28.9855	0	86.9565	14.4928	0	0	0	14.4928	14.4928	0	0	0	0
	B-L2	0	72.4638	0	0	72.4638	0	14.4928	0	0	0	0	0	0	0	0	0	0	0	0	0	0	0	0	0	0	0	0	0	0	14.4928	0	0	0	0	0	0	0	0	0	0	0	0	0	0	0	0	0	0
	T-L1	0	275.362	0	28.9855	202.899	43.4783	0	0	14.4928	0	28.9855	159.42	0	0	43.4783	0	57.971	28.9855	0	0	0	0	0	0	0	0	0	0	275.362	0	0	57.971	0	14.4928	43.4783	159.42	0	202.899	14.4928	0	0	0	0	0	86.9565	28.9855	0	28.9855
	T-W	0	43.4783	0	14.4928	173.913	0	0	0	0	0	0	43.4783	0	0	43.4783	0	0	0	0	0	0	0	0	0	0	0	0	0	0	0	0	0	14.4928	0	0	43.4783	0	57.971	0	0	0	0	0	0	0	0	0	0
	T-L2	0	14.4928	0	86.9565	579.71	0	0	0	0	0	0	0	0	0	43.4783	28.9855	0	0	0	28.9855	0	0	0	0	0	782.609	43.4783	14.4928	43.4783	0	14.4928	0	43.4783	0	0	144.928	0	0	0	14.4928	0	0	28.9855	0	0	0	0	0
	C	0	43.4783	14.4928	0	3144.93	0	0	0	0	0	0	57.971	0	0	14.4928	0	14.4928	28.9855	0	43.4783	0	0	0	0	0	0	0	0	57.971	0	0	57.971	14.4928	0	0	43.4783	14.4928	0	0	0	0	0	0	0	0	0	0	14.4928
[truncated: 75 more columns]
